# Supplementary material for: Evidence for Host Epigenetic Signatures Arising From Arbovirus Infections: A Systematic Review
Source: PubMed Central journal article supplement (PMC6554415; doi:10.3389/fimmu.2019.01207), 2019-05-31
Supplement: Table_1.pdf [file Table_1.pdf]

| Author         | Year | Reasons for exclusion |
|----------------|------|-----------------------|
| Avilla-Bonilla | 2017 | not human cells       |
| Castilo        | 2016 | not human cells       |
| Castrillon     | 2017 | not human cells       |
| Chang          | 2016 | not human cells       |
| Chen           | 2016 | not human cells       |
| McLean         | 2017 | in silico study       |
| Pylro          | 2016 | in silico study       |
| Sharma         | 2015 | not human cells       |
| Shind          | 2015 | in silico study       |
| Thounaujon     | 2014 | not human cells       |
| Thounaujon     | 2014 | not human cells       |
